# Supplementary material
Source: PubMed Central journal article supplement (PMC6105890)
Supplement: zii999092512s1.pdf [file zii999092512s1.pdf]

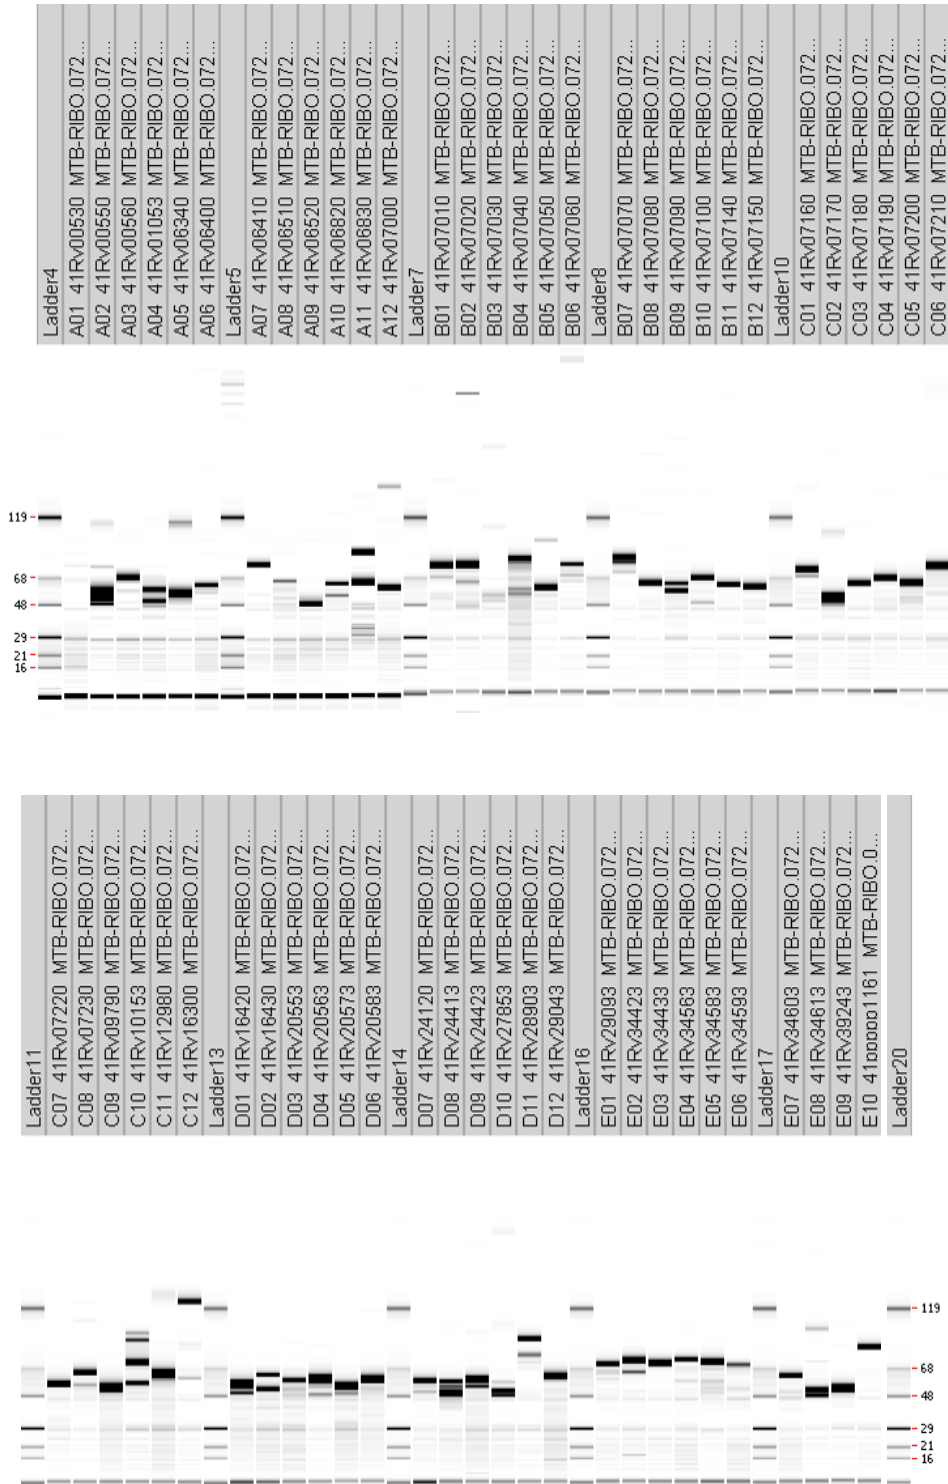

**Supplemental Figure S1. Caliper electrophoresis of 57 mycobacterial ribosomal proteins.** Mycobacterial ribosomal proteins expressed in *E. coli* (strain BL21) and purified by affinity tag purification were loaded into a LabChipGX caliper electrophoresis analyzer (PerkinElmer). Results were analyzed against a standard protein ladder and resulting bands were assessed for both purity and molecular weight. The images shown are representative of two separate experiments and protein purifications.

A

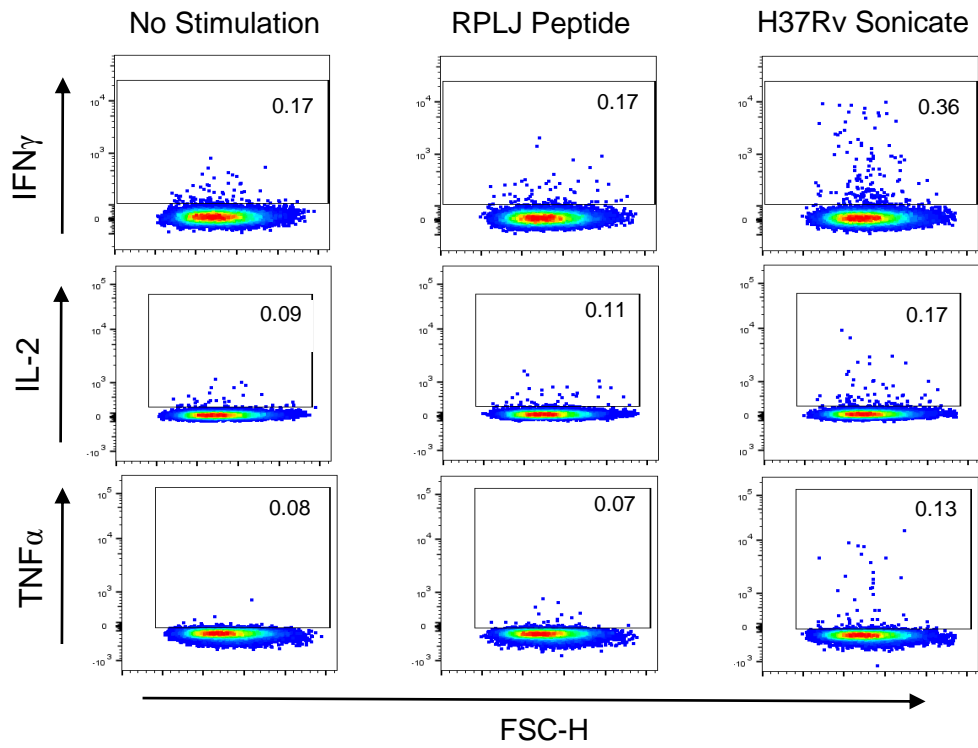

B

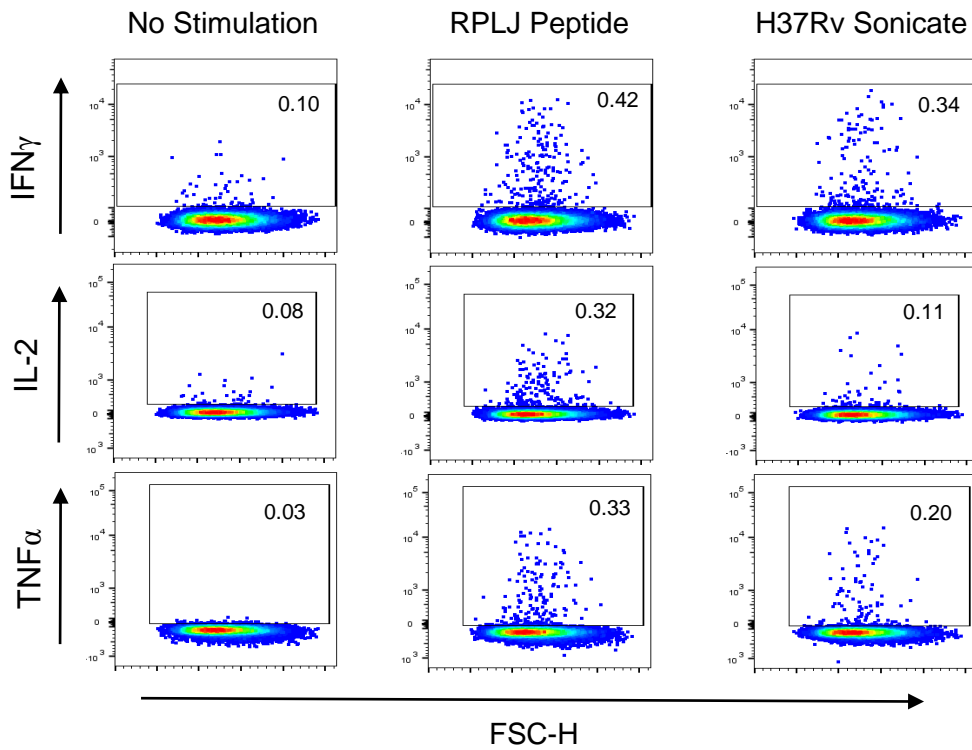

**Supplemental Figure 2. Samples of dot plots of FACS analyses of intracellular**

**cytokine staining.** Groups of C57BL/6 mice (n = 4) were immunized with  $5 \times 10^6$  CFU s.c. BCG only (A), or were immunized similarly with BCG followed four weeks later by two administrations of RplJ protein (25  $\mu$ g) and CpG-ODN 1826 (20  $\mu$ g) s.c. two weeks apart (B). Four weeks post final immunization, single cell suspensions of splenocytes were re-stimulated with RplJ<sub>TB146-160</sub> peptide (10  $\mu$ g/ml) or H37Rv sonicate (10  $\mu$ g/ml) as indicated. After 6h of re-stimulation, cells were fixed, permeabilized and stained for cytokines as described in Methods, and analyzed by FACS. Samples of dot plots from one representative mouse in each group portraying no re-stimulation, re-stimulation with RPLJ peptide, and re-stimulation with H37Rv sonicate are shown.

| Rv #   | RPS/L | F-Primer                                   | R-Primer                                      | MW    |
|--------|-------|--------------------------------------------|-----------------------------------------------|-------|
| Rv0053 | rpsF  | TACTTCCAATCCAATGCCCGTCCATACGAAATCATGGTCATC | TTATCCACTTCCAATGTTAGTGCTGTGCGGTGCGCATTAC      | 54.72 |
| Rv0055 | rpsR1 | TACTTCCAATCCAATGCCGCCAAGTCCAGCAAGCGGC      | TTATCCACTTCCAATGTTACCACCCGAAGACGTAAGG         | 53.33 |
| Rv0056 | rplI  | TACTTCCAATCCAATGCCAAGCTCATTCTCACGGCCGATG   | TTATCCACTTCCAATGTTAGCTGTGCGCCACGACGTC         | 59.95 |
| Rv0105 | rpmB1 | TACTTCCAATCCAATGCCTCGCCCGTCCAAATCAC        | TTATCCACTTCCAATGTTACAGGATCGCCCGGTTG           | 54.31 |
| Rv0634 | rpmG2 | TACTTCCAATCCAATGCCCGTCCAGTCAAGCTGC         | TTATCCACTTCCAATGTTACCAGCTCTCGCGGTG            | 50.28 |
| Rv0640 | rplK  | TACTTCCAATCCAATGCCGCCGGAAGAAGAAGTGC        | TTATCCACTTCCAATGTTATTCGACGGTGATGCCATCG        | 58.79 |
| Rv0641 | rplA  | TACTTCCAATCCAATGCCGCAAGACCAAGCAAGGCATATCG  | TTATCCACTTCCAATGTTACTCCCGCGAAGTTGCG           | 68.54 |
| Rv0651 | rplJ  | TACTTCCAATCCAATGCCCGCAGGGTGCACAAGGCC       | TTATCCACTTCCAATGTTACTCGGCTGAGTCTGGGCC         | 62.26 |
| Rv0652 | rplL  | TACTTCCAATCCAATGCCGCAAAGCTCTCCACCGACG      | TTATCCACTTCCAATGTTACTTGACGGTGACGGTGGCG        | 57.22 |
| Rv0682 | rpsL  | TACTTCCAATCCAATGCCCAACCCATCCAGCAAGCTGG     | TTATCCACTTCCAATGTTAGCCCTTCTCCTCTTAGCGC        | 57.63 |
| Rv0683 | rpsG  | TACTTCCAATCCAATGCCCCACGCAAGGGGGCCG         | TTATCCACTTCCAATGTTACCAGCGATAATGCGCAAAGGC      | 61.38 |
| Rv0700 | rpsJ  | TACTTCCAATCCAATGCCCGGGGACAGAAGATCCGCATC    | TTATCCACTTCCAATGTTACTGGATGTTGACGTGCGACGC      | 55.21 |
| Rv0701 | rplC  | TACTTCCAATCCAATGCCGCACGAAAGGGCATTCTCGG     | TTATCCACTTCCAATGTTACTTCTCACCTCGTTTGATCGCAC    | 66.88 |
| Rv0702 | rplD  | TACTTCCAATCCAATGCCGCTGCGCAAGAGCAGAAGAC     | TTATCCACTTCCAATGTTAGCGCGAAACCTCTCGGAC         | 67.53 |
| Rv0703 | rplW  | TACTTCCAATCCAATGCCGCGACGCTCGCTGACCC        | TTATCCACTTCCAATGTTAGCTTCTCCTGAAAGGAAAGCCG     | 54.74 |
| Rv0704 | rplB  | TACTTCCAATCCAATGCCCAATTCGCAAGTACAAGCCAC    | TTATCCACTTCCAATGTTAACGCGAGTCTCTTGCCG          | 74.36 |
| Rv0705 | rpsS  | TACTTCCAATCCAATGCCCCACGACGCTGAAGAAGG       | TTATCCACTTCCAATGTTATCGCGCTGTGCTCTTCGG         | 54.59 |
| Rv0706 | rplV  | TACTTCCAATCCAATGCCACTGCGGCTACTAAGGCTACC    | TTATCCACTTCCAATGTTAGTCTGACGCTCCCTTCGCTG       | 64.17 |
| Rv0707 | rpsC  | TACTTCCAATCCAATGCCGCGCAAAAGATCAATCCGCATGG  | TTATCCACTTCCAATGTTAGCTCTCCGTGCTCGCG           | 73.81 |
| Rv0708 | rplP  | TACTTCCAATCCAATGCCCTGATTCCCGTAAAGTAAACATCG | TTATCCACTTCCAATGTTAGAACTTCTCCTCTGAGTAAATAATG  | 59.48 |
| Rv0709 | rpmC  | TACTTCCAATCCAATGCCCGAGTGGGTGTCTCGCCG       | TTATCCACTTCCAATGTTACGATTCCTTACCATCGGGCC       | 52.64 |
| Rv0710 | rpsQ  | TACTTCCAATCCAATGCCATGGCAGAGGCTAAGACCGG     | TTATCCACTTCCAATGTTACTTAGCCTTCTCGAGGATCTCG     | 58.66 |
| Rv0714 | rplN  | TACTTCCAATCCAATGCCATTCAGCAGGAATCGCGGCTG    | TTATCCACTTCCAATGTTACACACCTCCGGGGCCAG          | 57.21 |
| Rv0715 | rplX  | TACTTCCAATCCAATGCCAAGTCCACAAAGGGCGACCC     | TTATCCACTTCCAATGTTAAATGTCCTTGGCGTTCGCGTTG     | 55.26 |
| Rv0716 | rplE  | TACTTCCAATCCAATGCCACCACTGCACAGAAGTTCACG    | TTATCCACTTCCAATGTTAGTCTCCTGAAAGGAAAGCCG       | 64.8  |
| Rv0717 | rpsN1 | TACTTCCAATCCAATGCCGCAAGAAGGCACTGGTCAAC     | TTATCCACTTCCAATGTTACCAGTGTCTTCTGACG           | 50.61 |
| Rv0718 | rpsH  | TACTTCCAATCCAATGCCACGATGACGGACCCGATCG      | TTATCCACTTCCAATGTTACCAGACATATGCGAGGACTTCG     | 58.2  |
| Rv0719 | rplF  | TACTTCCAATCCAATGCCTCGGTATTGGTAAGCAGCCG     | TTATCCACTTCCAATGTTACTACTGTCTTCCGACCTTGC       | 63.16 |
| Rv0720 | rplR  | TACTTCCAATCCAATGCCGCGCAATCAGTTTCCGCGAC     | TTATCCACTTCCAATGTTAGAACTCAATCCGTTCTCGCGTG     | 56.97 |
| Rv0721 | rpsE  | TACTTCCAATCCAATGCCGCGGACGACCCGGCC          | TTATCCACTTCCAATGTTATATGCTTACTCGGCAAAAGCCG     | 66.67 |
| Rv0722 | rpmD  | TACTTCCAATCCAATGCCTCACAGTGAAGATCACCCAGG    | TTATCCACTTCCAATGTTATGCTTCCCTCCGGTCTG          | 51.13 |
| Rv0723 | rplO  | TACTTCCAATCCAATGCCACGCTCAAGTGCATGACCTG     | TTATCCACTTCCAATGTTAGAGCTCGGTGGCTGAACCG        | 59.32 |
| Rv0979 | rpmF  | TACTTCCAATCCAATGCCGCTGTGCCAAAGCGCAGAAAG    | TTATCCACTTCCAATGTTAGCGCTTACGAAATCGATGAGGC     | 50.29 |
| Rv1015 | rplY  | TACTTCCAATCCAATGCCCGCAAAATCCGCAAGCAACCG    | TTATCCACTTCCAATGTTACTCGGACTCGCCAGCGG          | 66.23 |
| Rv1298 | rpmE  | TACTTCCAATCCAATGCCAAATCTGCAATTCGCGCATATGAG | TTATCCACTTCCAATGTTATGCTTATTCGCGGTTGAAACCGCTTG | 52.54 |
| Rv1630 | rpsA  | TACTTCCAATCCAATGCCCGGATCCACCGTCAAC         | TTATCCACTTCCAATGTTAAGCGCTGCCGGGAGTTTTTC       | 96.99 |
| Rv1642 | rplM  | TACTTCCAATCCAATGCCCCAAAGGCCAAGCCACAG       | TTATCCACTTCCAATGTTAGCGTTCAGCAACGACGTCG        | 51.00 |
| Rv1643 | rplT  | TACTTCCAATCCAATGCCGCAACGCTAAAGCGGGCG       | TTATCCACTTCCAATGTTAGCGGCTCCCGCGGAG            | 58.31 |
| Rv2055 | rpsR2 | TACTTCCAATCCAATGCCCGCCCAAAATCCGCGCG        | TTATCCACTTCCAATGTTATGGGCACAGTGCAGCGCG         | 53.48 |
| Rv2056 | rpsN2 | TACTTCCAATCCAATGCCGCAAGAAGTCCAAGATCGTCAAG  | TTATCCACTTCCAATGTTACCAGCTGGCTCCGCGAC          | 55.22 |
| Rv2057 | rpmG1 | TACTTCCAATCCAATGCCGCGCGCACCGACATCCG        | TTATCCACTTCCAATGTTAGCGTCTCCTCGCGAAAGTCC       | 50.37 |
| Rv2058 | rpmB2 | TACTTCCAATCCAATGCCTCCGCCACTGCCAAGTCAC      | TTATCCACTTCCAATGTTAGATCCGCTGCCCTGGC           | 52.88 |
| Rv2412 | rpsT  | TACTTCCAATCCAATGCCGCAACATCAAGTCGACGACG     | TTATCCACTTCCAATGTTAGAGCTTGTGAGCGCCTGG         | 53.19 |
| Rv2441 | rpmA  | TACTTCCAATCCAATGCCGCACACAAGAAGGGGGCTTC     | TTATCCACTTCCAATGTTAGGCGAGTGGTGAACCGACG        | 52.75 |
| Rv2442 | rplU  | TACTTCCAATCCAATGCCATGGCGACTACGCAATCGTC     | TTATCCACTTCCAATGTTATGCGATGCCGTGACCTTC         | 54.93 |
| Rv2785 | rpsO  | TACTTCCAATCCAATGCCGCGTGCAGCCGAGCAAAAAAG    | TTATCCACTTCCAATGTTATGCGCAGCAGGCCCAAGC         | 54.26 |
| Rv2890 | rpsB  | TACTTCCAATCCAATGCCGCGTAGTACCATGAAGCAG      | TTATCCACTTCCAATGTTAGGATGCATGTGGTTGGTTG        | 74.88 |
| Rv2904 | rplS  | TACTTCCAATCCAATGCCAACCAGCTGGACTTCTGTCG     | TTATCCACTTCCAATGTTAGCGCTTCTCCTTGATCTTGGC      | 56.80 |
| Rv2909 | rpsP  | TACTTCCAATCCAATGCCGCTGTGAAGATCAAGTCACTCG   | TTATCCACTTCCAATGTTAGCTTTCGCGCTCAGCTCG         | 61.22 |
| Rv3442 | rplI  | TACTTCCAATCCAATGCCACCGAAACCCACCGCCG        | TTATCCACTTCCAATGTTAGCGCTGTCTACTGGGGC          | 60.22 |
| Rv3443 | rplM  | TACTTCCAATCCAATGCCCCACGTAACGCGCCAAAG       | TTATCCACTTCCAATGTTATGCGCACCTGCTGTGAGC         | 60.12 |
| Rv3456 | rplQ  | TACTTCCAATCCAATGCCCCAAAGCTACCAAGGGCC       | TTATCCACTTCCAATGTTAATCTCGGGGGCTCTGCG          | 63.26 |
| Rv3458 | rpsD  | TACTTCCAATCCAATGCCGCTGTACACCGGACCCG        | TTATCCACTTCCAATGTTACTTGTAGTACTCGACGATCAG      | 67.26 |
| Rv3459 | rpsK  | TACTTCCAATCCAATGCCACCCAGCAAAAAAGGGCCG      | TTATCCACTTCCAATGTTAGACGCGCCGGCGCTTG           | 58.57 |
| Rv3460 | rpmM  | TACTTCCAATCCAATGCCGCTGACTGCTCGGCGTC        | TTATCCACTTCCAATGTTACTAGCTTCTCTTCTGCTGC        | 58.13 |
| Rv3461 | rpmJ  | TACTTCCAATCCAATGCCAAGGTAACCCGACGCTCAAGC    | TTATCCACTTCCAATGTTAGCGCTTCTGTTGTGACG          | 48.13 |
| Rv3924 | rpmH  | TACTTCCAATCCAATGCCACCAAGGGCAAAAGGACCTTCC   | TTATCCACTTCCAATGTTAAGCACTGAGCGTGCGCCG         | 49.41 |
| GST    | N/A   | TACTTCCAATCCAATGCCGCTGTGCTGATCGAAGGGC      | TTATCCACTTCCAATGTTAACCCCTGCACCAAAACCCCTTG     | 81.74 |

**Supplemental Table S1. List of primers for amplification of 57 ribosomal proteins from Mtb gDNA and expected molecular weight of purified protein products.** Nucleotide primers for amplification for selected mycobacterial genes from Mtb gDNA are listed. Primers were synthesized by Sigma-Aldrich at 70% purity. Expected molecular weight (MW) of the proteins from produced from the expression vector pmscg9 are shown in the column on the far right.

| Rv0652 Top 33  |               |                  | Rv0683 Top 33 |              |                  |
|----------------|---------------|------------------|---------------|--------------|------------------|
| #              | Residue Range | Peptide          | #             | Peptide Name | Peptide          |
| 1              | 39-53         | PVAVAAAGAAPAGAA  | 53            | 15-Jan       | MPRKGPAKRPVND    |
| 2              | 30-44         | ETFEVTAAPVAVAA   | 54            | 139-153      | EDTHKMAEANRAFAH  |
| 3              | 34-48         | VTAAAPVAVAAAGAA  | 55            | 80-94        | VGGATYQVPVEVRPD  |
| 4              | 26-40         | KKFEETFEVTAAPV   | 56            | 16-30        | PVYGSQVLTVLNKV   |
| 5              | 43-57         | AAAGAAPAGAAVEAA  | 57            | 85-99        | YQVPVEVRPDRSTTL  |
| 6              | 116-130       | AKAKLEAAGATVTVK  | 58            | 42175        | PAPKRPVNDPVVGS   |
| 7              | 93-107        | AKDLVDGAPKPLEK   | 59            | 122-136      | NEILDASNGLGASVK  |
| 8              | 47-61         | AAPAGAAVEAAEEQS  | 60            | 26-Dec       | LVNDPVVGSQVLVTQL |
| 9              | 22-36         | SDFVKKFEETFEVTA  | 61            | 76-90        | RSRRVGGATYQVPVE  |
| Rv2904 Top 33  |               |                  | 62            | 89-103       | VEVRPDRSTTLALRW  |
| #              | Peptide Name  | Peptide          | 63            | 39-53        | AERIVYGALEQARDK  |
| 10             | 69-83         | VERTFPVHSPNIDHI  | 64            | 61-75        | TLKRALDNVVKPALEV |
| 11             | 15-29         | DIPAFNPGDTINVHV  | Rv0700 Top 33 |              |                  |
| 12             | 65-79         | YGVGVERTFPVHSPN  | #             | Peptide Name | Peptide          |
| 13             | 73-87         | FPVHSPNIDHIEVVT  | 65            | 32-46        | TGASVVGPVPLPTEK  |
| 14             | 36-50         | KERLQVFKGVVIRRQ  | 66            | 72-86        | RUIDIDPTPKTVDA   |
| 15             | 61-75         | RKESYGVGVERTFPV  | 67            | 28-42        | TVVRTGASVVGPVPL  |
| 16             | 45-59         | VVIRRQGGGIREFTT  | 68            | 36-50        | VVGPVPLPTEKNVYC  |
| 17             | 19-33         | FNPGDITNVHVKIVIE | 69            | 24-38        | KIVETVVRTGASVVG  |
| Rv0707 Top 33  |               |                  | 70            | 76-90        | IIDPTPKTVDALMRI  |
| #              | Peptide Name  | Peptide          | 71            | 26-Dec       | AYDHEAIDASARKIV  |
| 18             | 210-224       | GKRELAAPAGADR    | 72            | 85-99        | DALMRIDLPAASVDVN |
| 19             | 256-270       | GEEAAPDAAAPVEAQ  | Rv0701 Top 33 |              |                  |
| 20             | 214-228       | LAAAAPAGADRRPRE  | #             | Peptide Name | Peptide          |
| 21             | 234-248       | RPRRSAGSTTATGT   | 73            | 25-39        | PVTVVKAGPNVVTRI  |
| 22             | 206-220       | DIVGGKRELAAPAA   | 74            | 66-80        | LTGQYTAAGVNPRRY  |
| 23             | 64-78         | RVDIHTARPVIGR    | 75            | 70-84        | YTAAGVNPVRYLAE   |
| 24             | 252-266       | RAAGGEEAAPDAAAP  | 76            | 130-144      | HGFRGQASHGAQAV   |
| 25             | 125-139       | NRVAFRRAMRKAIQS  | 77            | 126-140      | TMKRHGRGQASHG    |
| 26             | 227-241       | RERPSTGTRPRRSAS  | 78            | 147-161      | RPGSIGGCATPARVF  |
| 27             | 166-180       | EFYREGRVPLHLTRA  | 79            | 46-63        | AVQLAYGEISPRKVN  |
| 28             | 160-274       | APDAAAPVEAQSTES  | 80            | 155-169      | ATPARVFKGTRMAGR  |
| 29             | 247-261       | GTADAGRAAGGEEAAP | 81            | 62-76        | VNKPLTGQYTAAGVN  |
| 30             | 238-252       | SGASGTTATGTDAGR  | 82            | 134-148      | GQGASHGAQAVHRRP  |
| 31             | 135-149       | KAIQSAMRQPNVKGI  | 83            | 190-204      | GVLLIKGAVPGRGTGG |
| 32             | 182-196       | IDYGLYEAKTTFGRI  | 84            | 21-35        | NRVVPVTVKAGPNV   |
| 33             | 162-176       | MSRSEFYREGRVPLH  | 85            | 53-67        | AYGEISPRKVNKPLT  |
| 34             | 153-167       | CSGRLLGAEMSRSEF  | 86            | 90-104       | DAATEYQVQDELTAE  |
| 35             | 131-145       | RAMRKAIQSAMRQPN  | 87            | 117-131      | TSKGGKFGATMKRHG  |
| 36             | 101-115       | NILEVKNPESQAQLV  | 88            | 159-173      | RVFKGTRMAGRMGND  |
| 37             | 223-237       | DRPRRERPSTGTRPRR | 89            | 17-31        | FDESNRVVPVTVVKA  |
| Rv2058c Top 33 |               |                  | Rv0714 Top 33 |              |                  |
| #              | Peptide Name  | Peptide          | #             | Peptide Name | Peptide          |
| 38             | 34-48         | QQRYYLPSEGRRIIR  | 90            | 108-122      | EKRFMKIISLAPEVL  |
| 39             | 21-Jul        | VTGRKPGFGNTVSHS  | 91            | 73-87        | DGSYKFDENAAVII   |
| 40             | 38-52         | YYLPSEGRRIIRLRSV | 92            | 27-41        | GSSRRYAGIGDVIVA  |
| 41             | 30-44         | SPNIQQRYYLPSEGE  | 93            | 41-55        | ATVKDAIPGGNVKRG  |
| 42             | 23-37         | RRSRRRSPNIQQR    | 94            | 77-91        | IKFDENAIVIKPDN   |
| Rv0640 Top 33  |               |                  | 95            | 37-51        | DVIVATVKDAIPGGN  |
| #              | Peptide Name  | Peptide          | 96            | 52-66        | VKRGDVKAVVVRTV   |
| 43             | 26-Dec        | KLQIVAGQANPAPPV  | 97            | 93-107       | PRGTRIFGVPVGRFLR |
| 44             | 67-81         | SFTFTLTKPPAAKLL  | 98            | 20-34        | LCIRVLGGSSRRYAG  |
| 45             | 16-30         | VAGQANPAPPVGPAL  | 99            | 33-47        | AGIGDVIVATVKDAI  |
| 46             | 39-53         | EFCKAYNAATENQRG  | Rv0682 Top 33 |              |                  |
| 47             | 20-34         | ANPAPPVGPALGQHG  | #             | Peptide Name | Peptide          |
| 48             | 63-77         | YEDRSFTFTLTKPPA  | 100           | 24-Oct       | KRRDKISKVKTAAL   |
| 49             | 80-94         | LLKAAAGVAKGSAEP  | 101           | 14-28        | DKISKVKTAALKGSP  |
| 50             | 71-85         | TLKTPPAKLLLKAA   | 102           | 18-32        | KVKTAALKGSPQRRG  |
| 51             | 125-139       | AAAKIAGTARSMGI   | 103           | 30-44        | RRGVCTRVTYTTPKK  |
| 52             | 76-90         | PAKLLKAAAGVAKG   | 104           | 34-48        | CTRVYTTTPKKPNSA  |
|                |               |                  | 105           | 38-52        | YTTTPKKPNSALRKV  |
|                |               |                  | 106           | 57-71        | LTSQVEVTAYIPGEG  |
|                |               |                  | 107           | 61-75        | VEVTAYIPGEGHNLQ  |
|                |               |                  | 108           | 65-79        | AYIPGEGHNLQEHSM  |
|                |               |                  | 109           | 90-104       | LPGVRYKIIRGSLDT  |

**Supplemental Table 2. Table of peptides included in selected immunogenic ribosomal peptide library.** Peptides selected from 10 Mtb immunogenic ribosomal proteins based on strength of binding to MHCII I-A<sup>b</sup> are listed. Peptides were synthesized as crude material (estimated 70-80% purity) by Mimotopes (Mulgrave, Victoria, Australia). Peptides were reconstituted in DMSO and used at a final concentration of 10 µg/ml.



| Peptide # | Peptide Sequence | Protein | Peptide Start |
|-----------|------------------|---------|---------------|
| 1         | FDAAITPDQMAKVG   | rplA    | 111           |
| 2         | VTVVKAGPVVTRIR   | rplC    | 26            |
| 3         | VAGQFAAGVNPVRRH  | rplC    | 66            |
| 4         | GFRGGQGAHQAAQAVH | rplC    | 131           |
| 5         | EALQQEFNYANVMQI  | rplE    | 21            |
| 6         | EFNYANVMQIPGVVK  | rplE    | 26            |
| 7         | GRNVLPRGLAIVAS   | rplI    | 26            |
| 8         | GDTGKLFQSVTAADV  | rplI    | 86            |
| 9         | KAHISVGTHTPVTVK  | rplI    | 121           |
| 10        | ADIAEQFKASTATVY  | rplJ    | 11            |
| 11        | QFKASTATVVEYRG   | rplJ    | 16            |
| 12        | IEGLDFLAGPTAIA   | rplJ    | 66            |
| 13        | ELFAGPTAIAFVKG   | rplJ    | 71            |
| 14        | KAAGLFNAPASQVAR  | rplJ    | 146           |
| 15        | FNAPASQVARLAAAL  | rplJ    | 151           |
| 16        | RSFTFALKTPPAALK  | rplK    | 66            |
| 17        | PGAAAGGAAEAEEQ   | rplL    | 46            |
| 18        | KEAKDLVDSAPKPLL  | rplL    | 91            |
| 19        | SDVVGLRLASAAATL  | rplM    | 21            |
| 20        | EKFMKIVLSAPEVL   | rplN    | 108           |
| 21        | GSAREAITAAGGSAT  | rplO    | 131           |
| 22        | AREAITAAGGSATEL  | rplO    | 133           |
| 23        | EQRGIASGGTSVDFG  | rplP    | 16            |
| 24        | QLIAERAKAAGVETV  | rplR    | 86            |
| 25        | VFDRTGGTYGGRIAA  | rplR    | 101           |
| 26        | GTYGGRIALADAA    | rplR    | 106           |
| 27        | WISRIANAARANDIT  | rplT    | 61            |
| 28        | AELAVSDPAAFATLV  | rplT    | 96            |
| 29        | MSTVTEFSPATAKAR  | rplV    | 1             |
| 30        | TVTTEFSPATAKARV  | rplV    | 3             |
| 31        | KARYVRSATKARRV   | rplV    | 13            |
| 32        | EALDILRWAPQAASE  | rplV    | 38            |
| 33        | PVAKVIASAAANAQN  | rplV    | 53            |
| 34        | PPKQKGASAAARSR   | rplV    | 118           |
| 35        | SARSRRAQSGSKAAAT | rplV    | 128           |
| 36        | RAIVKLAAGSKPIDL  | rplW    | 81            |
| 37        | MAKTANIPNKLTARV  | rplY    | 1             |
| 38        | AVLRSHGTNAILTD   | rplY    | 56            |
| 39        | LLVNVVVEAPSAEAL  | rplY    | 176           |
| 40        | DDTLFALAPGAVEFG  | rpmA    | 56            |
| 41        | KTYLPSGERRILRL   | rpmB    | 36            |
| 42        | RRAQWKAEAPGLVTM  | rpmF    | 16            |
| 43        | DIGLRFGLPASLVEM  | rpsA    | 141           |
| 44        | EDPWRFHARTHAIQ   | rpsA    | 281           |
| 45        | QMEKFAAAEAANA    | rpsA    | 431           |
| 46        | AAAEAEANAPVSNQ   | rpsA    | 436           |
| 47        | AADASAEAGAAPESS  | rpsB    | 259           |
| 48        | KRELAAPASDRPR    | rpsC    | 211           |
| 49        | GRAATSDAPAAAGTAA | rpsC    | 250           |
| 50        | SDAPAAAGTAAAEAP  | rpsC    | 255           |
| 51        | AGTAAAEAPAEASTE  | rpsC    | 260           |
| 52        | GTAAAEAPAESTES   | rpsC    | 261           |
| 53        | MARYTGPATKRSRRL  | rpsD    | 1             |
| 54        | VVYRGLARTRRMAR   | rpsD    | 96            |
| 55        | KNFRVPLIGSTITH   | rpsE    | 94            |
| 56        | ASPGTGVLAGGAARA  | rpsE    | 124           |
| 57        | GVIAGGAARAVLECA  | rpsE    | 129           |
| 58        | LPIEDVAPAGMLKAR  | rpsE    | 184           |
| 59        | RESELAIAAAREGS   | rpsE    | 199           |
| 60        | ESELAIAAAREGSA   | rpsE    | 200           |
| 61        | MPRKGPAPKRLVND   | rpsG    | 1             |
| 62        | KAGFLTRDPAIERK   | rpsI    | 120           |
| 63        | RTGASVVGVPVLPTE  | rpsJ    | 31            |
| 64        | DPQGNVIAWASSGHV  | rpsK    | 45            |
| 65        | SSGHVGFKGSRKSTP  | rpsK    | 55            |
| 66        | GFKGSRKSTPFAAQL  | rpsK    | 60            |
| 67        | RKSTPFAAQLAENA   | rpsK    | 65            |
| 68        | RVYTTTPKPNALSRL  | rpsL    | 36            |
| 69        | SSPERRAAVSAQR    | rpsN    | 36            |
| 70        | AQYWLGVGAQPTTEPV | rpsP    | 56            |
| 71        | GVGAQPTTEPVALLK  | rpsP    | 61            |
| 72        | AEAPAEAAEAPAEAA  | rpsP    | 136           |
| 73        | EAEAPAEAAEAPAE   | rpsP    | 134           |
| 74        | MSKTSKAYRAAAKV   | rplA    | 1             |
| 75        | KAYRAAAKVDRTNL   | rplA    | 6             |
| 76        | DRTNLYLPQAAKLA   | rplA    | 16            |
| 77        | GEKADAAVAAGADV   | rplA    | 81            |
| 78        | GGWLEFDAIATPDQ   | rplA    | 106           |

|     |                   |       |     |
|-----|-------------------|-------|-----|
| 79  | MAIRKYKPTTPGRRG   | rplB  | 1   |
| 80  | LSQGDVVESGANADI   | rplB  | 111 |
| 81  | TMKRHGFRRGQASHG   | rplC  | 126 |
| 82  | RRPGSIIIGCATPARV  | rplC  | 146 |
| 83  | ALNAYIAANTTSEE    | rplD  | 206 |
| 84  | AVIAANTTSEEVA     | rplD  | 209 |
| 85  | GVGNVYFLGAEQAVF   | rplE  | 131 |
| 86  | MSRIGKQPIPVPAV    | rplF  | 1   |
| 87  | GSNLEFALGYSHPVV   | rplF  | 101 |
| 88  | FALGYSHPVIEAPE    | rplF  | 106 |
| 89  | GITFAVQAPTFTVTS   | rplF  | 121 |
| 90  | NEIKAAIEALGPIAL   | rplI  | 66  |
| 91  | AI EALGPIALPVKTS  | rplI  | 71  |
| 92  | PTAIFVTGEPVDAA    | rplJ  | 76  |
| 93  | KGGYMDGHPLTVAEV   | rplJ  | 106 |
| 94  | LAGAMKGNLAKAAGL   | rplJ  | 136 |
| 95  | IKLQIVAGQANPAPP   | rplK  | 11  |
| 96  | VAGQANPAPPVGPAL   | rplK  | 16  |
| 97  | KKFEETFEVTAAPV    | rplL  | 26  |
| 98  | TFEVTAAPVAVAAA    | rplL  | 31  |
| 99  | AAAPVAVAVAAAGAAPA | rplL  | 36  |
| 100 | AVAAAGAAPAGAAVE   | rplL  | 41  |
| 101 | AKAKLEAAGATVTVK   | rplL  | 116 |
| 102 | LRGKHKPTFAPNVDS   | rplM  | 36  |
| 103 | KLRVYAGPEHPHSAQ   | rplM  | 121 |
| 104 | LHDLRPARGSKIART   | rplO  | 5   |
| 105 | RVLFELYPNEGVAR    | rplP  | 101 |
| 106 | EGVARAALTRAHKL    | rplP  | 111 |
| 107 | NRARRVAAAQAKAKK   | rplQ  | 126 |
| 108 | AKAKKAAAMPTTEESE  | rplQ  | 136 |
| 109 | LVNDLNGTVAASS     | rplR  | 46  |
| 110 | NGTTVAASSIEADV    | rplR  | 51  |
| 111 | LRWAPQAASGPVAKV   | rplV  | 46  |
| 112 | QAASGPVAKVIASAA   | rplV  | 51  |
| 113 | IASAAANAQNNGGDL   | rplV  | 61  |
| 114 | VATVYADQGTAKRI    | rplV  | 81  |
| 115 | KAASKVGATAPAKKA   | rplV  | 140 |
| 116 | VGATAPAKKAAAKAP   | rplV  | 145 |
| 117 | PAKKAAPAKKAPAKK   | rplV  | 150 |
| 118 | AAKAPAKKAPASSGV   | rplV  | 155 |
| 119 | KKTPAKKAPAKKAPA   | rplV  | 170 |
| 120 | KKAPAKKAPAKASET   | rplV  | 175 |
| 121 | KKAPAKASETSAAKG   | rplV  | 180 |
| 122 | VEKIFAVKVASVNTA   | rplW  | 46  |
| 123 | AVKVASVNTANRQOK   | rplW  | 51  |
| 124 | DYAAVLRHSGTNAVL   | rplY  | 51  |
| 125 | TAGQIALPAGVSLUS   | rplY  | 156 |
| 126 | VNVVVKAPTAEELEG   | rplY  | 176 |
| 127 | AAVEAGEEAAGEESE   | rplY  | 201 |
| 128 | GRRRAARAGSAPAHF   | rpmB1 | 66  |
| 129 | VLLDIGYKTEGVIPA   | rpsA  | 51  |
| 130 | IRDMAKVPSAIVVVD   | rpsB  | 151 |
| 131 | QELLASATASATPSA   | rpsB  | 251 |
| 132 | SATASATPSATATT    | rpsB  | 256 |
| 133 | ALTDAPAGATEPTTD   | rpsB  | 271 |
| 134 | DIVGGKRELAIAAPA   | rpsC  | 206 |
| 135 | RRSGASGTTATGTD    | rpsC  | 236 |
| 136 | GHFNVNGVHVNPSY    | rpsD  | 116 |
| 137 | VLLRPASPGTGVIAQ   | rpsE  | 125 |
| 138 | VVIDVKAAPATVSEL   | rpsF  | 61  |
| 139 | MTETTPAPQTPAAPA   | rpsI  | 1   |
| 140 | PAPQTPAAPAGPAQS   | rpsI  | 6   |
| 141 | PAAPAGPAQSFVLER   | rpsI  | 11  |
| 142 | GRLVAAAPKPSKLEV   | rpsP  | 91  |
| 143 | SKLEVFNAALAAADG   | rpsP  | 101 |
| 144 | FNAALAAADGGPTTE   | rpsP  | 106 |
| 145 | KKSPAKKAAKAEP     | rpsP  | 126 |
| 146 | KKAAPAEAPAPQPEQ   | rpsP  | 131 |
| 147 | MAEAKTGAKAAPRVA   | rpsQ  | 1   |
| 148 | TGAKAAPRVAKAAKA   | rpsQ  | 6   |
| 149 | APRVAKAAKAAPKKA   | rpsQ  | 11  |
| 150 | KAAPKKAAPNDA      | rpsQ  | 16  |
| 151 | APNDAEIIGAANAAN   | rpsQ  | 26  |
| 152 | QAANKKSALAQALNK   | rpsT  | 71  |
| 153 | AANKKSALAQALNKL   | rpsT  | 72  |

**Supplemental Table 3. Table of peptides included in total ribosomal peptide library.**

Peptides selected from all 57 mycobacterial ribosomal proteins based on strength of binding to MHCII I-A<sup>b</sup> are listed. Peptides were synthesized as crude material (estimated 70-80% purity) on a small scale (~1 mg) by A&A labs (San Diego). Peptides were reconstituted in DMSO and used at a final concentration of 10 µg/ml per peptide.
